1 **Thyroid cancer incidence and mortality in Latin America**

2

3 **Fábia Cheyenne Gomes de Morais Fernandes<sup>1</sup>, MSc**

4 **Dyego Leandro Bezerra de Souza<sup>2\*</sup>, PhD**

5 **Maria Paula Curado<sup>3</sup>, PhD**

6 **Isabelle Ribeiro Barbosa<sup>1</sup>, PhD**

7

8 <sup>1</sup> Faculty of Health Sciences of Trairi (FACISA), Federal University of Rio Grande do Norte,  
9 Natal, Rio Grande do Norte, Brazil;

10 <sup>2</sup> Graduate Program in Collective Health, Federal University of Rio Grande do Norte, Natal,  
11 Rio Grande do Norte, Brazil;

12 <sup>3</sup> Epidemiology Department, International Center for Research AC Camargo Center - São  
13 Paulo-SP, Brazil.

14

15

16 \*Corresponding author: Dyego Leandro Bezerra de Souza: [dysouz@yahoo.com.br](mailto:dysouz@yahoo.com.br)

17 CurrentAddress: Universidade Federal do Rio Grande do Norte / Federal University of Rio

18 Grande do Norte. Programa de Pós-Graduação em Saúde Coletiva / Graduate Program in

19 Collective Health. Avenida Senador Salgado Filho 1787, CEP: 59010-000 Lagoa Nova,

20 Natal-RN, Brazil. Telephone/fax: +55 84 3215-4133.

21

22 **Financing:** This work was financed in part by the Coordenação de Aperfeiçoamento de  
23 Pessoal de Nível Superior – Brazil (CAPES) – financing code 001, and by the Conselho  
24 Nacional de Desenvolvimento Científico e Tecnológico (CNPq), in the modality PIBIC  
25 CNPq.

26

27

28

29

30

31

32 **ABSTRACT**

33

34 This study analyzed trends in thyroid cancer incidence and mortality in countries of Latin  
35 America. Ecological study of time series, with incidence data extracted from the International  
36 Agency for Research on Cancer (IARC), in the 1990-2012 period and mortality data obtained  
37 from 16 countries of the World Health Organization (WHO), in the 1995-2013 period. The  
38 trend of incidence rate was analyzed by the Joinpoint regression. The average annual  
39 percentage change (AAPC) and the 95% confidence interval (CI 95%) were calculated for  
40 incidence and mortality. The average rate of thyroid cancer incidence was higher in Quito  
41 (Ecuador) between the ages of 40 to 59 years old, 42.2 new cases per 100,000 inhabitants, as  
42 well as mortality 4.8 deaths per 100,000 women inhabitants above 60 years old. There was an  
43 increase in thyroid cancer incidence trends in women, for all age groups, in Cali, Costa Rica  
44 and Quito and men in Costa Rica; there was stability above the age of 60 years old in Cali,  
45 Goiania, Quito and Valdivia in men, as well as women in Goiania and Valdivia. There was a  
46 trend of increasing mortality for females in three countries: Ecuador (AAPC= 3,28 CI 95%  
47 1,36;5,24), Guatemala (AAPC= 6,14 CI 95% 2,81;9,58) and Mexico (AAPC= 0,67 CI 95%  
48 0,16;1,18). Thyroid cancer in Latin America showed a high incidence, with increased  
49 incidence in women. Stability in mortality was observed for most countries of Latin America.

50

51 **Keywords:** Thyroid Neoplasms; Trends; Incidence; Mortality; Latin America.

52

53

54

55

56

57

58

59

60

61

62

63

64

65

## 66 INTRODUCTION

67

68 The thyroid malignancy neoplasm represents approximately 2% of all cancers in the  
69 world (1). In 2016, were estimated 238,000 new cases of thyroid cancer and 43.000 deaths for  
70 both sexes in the world, with a standardized incidence rate of 2.2/100,000 for male inhabitants  
71 and 4.4/100.000 for female inhabitants female (2). The incidence rate in Northern Americans  
72 exceeds most European countries (3, 4).

73 In South America, in 2012, the incidence rate for thyroid cancer was 8.4 cases/100.00  
74 women and 1.9/100,000 men (1). It was classified between the fifth to the tenth most common  
75 type of cancer among women and the 25th most commonly diagnosed cancer in men in  
76 Central and South America (5). There is an increased tendency to the female incidence in  
77 Brazil, Colombia, Costa Rica, and Ecuador, as the males in Brazil and Costa Rica (6). High  
78 income countries show a substantial increase in the incidence (7), considered to be two times  
79 higher compared to low/medium income countries, for both sexes (8).

80 Thyroid cancer is considered rare, but in the last 30 a sharp increase in incidence was  
81 registered, attributed to higher diagnostic intensity, although environmental influences,  
82 genetic and dietary merit further investigation (9, 10). This cancer is characterized with  
83 predominance in females, white race and the median age of 45 years, but with a tendency to  
84 increase among young adults (9, 11, 12).

85 Latin America faces difficulties to fulfill an agenda of continuous commitments, with  
86 appropriate financial incentives and effective approaches to cancer control. Therefore it  
87 becomes relevant to describe the epidemiological profile of thyroid cancer in these countries.  
88 The aim of this study was analyze the incidence, mortality, rates, and trends for thyroid cancer  
89 in Latin America.

90

## 91 METHODS

92

93 This is about an ecological time series study, based on secondary data available in the  
94 databases of the International Agency for Research on Cancer (IARC) and the World Health  
95 Organization (WHO) (13,14). Occurrence and mortality for malignant thyroid neoplasm were  
96 analyzed in Latin American countries.

97 Incident cases of thyroid malignancy, during the period of 22 years (1990-2012), were  
98 extracted from the *Cancer Incidence in Five Continents - CI5 PLUS*, which includes five  
99 Population Based Cancer Registries (PBCRs): four regional registries, Cali (Colombia), Quito

100 (Ecuador), Goiania (Brazil) and Valdivia (Chile) and one national record, Costa Rica (13).  
 101 The mortality data, for which the available information was analyzed of 16 countries of Latin  
 102 America, accounted for 90% of the population in Latin America between 1995 to 2013 (14).

103 The number of cases was extracted and adjusted rate-specific by age and calculated for  
 104 three age groups (25-39, 40-59, and 60-74) and for all ages. Specific rates, adjusted by age,  
 105 were calculated using the standard world population, according to sex and countries with  
 106 available data.

107 The incidence rates and standardized mortality rates were calculated by sex. Also were  
 108 calculated the Ratio of incidence and mortality rates by sex. The average annual percentage  
 109 change (AAPC) was estimated for incidence and mortality with a 95% confidence interval (CI  
 110 95%) in the period. The exception to these analyses were Suriname and Uruguay, due to the  
 111 lack of cases in the historical series. The statistical analyses were performed using the  
 112 software *Joinpoint Regression*, version 4.5.0.0 (15,16).

113

## 114 RESULTS

115 Between 1990 and 2012, the higher incidence rates of thyroid cancer were observed in  
 116 Quito (Ecuador) and Costa Rica, in females, aged 40 to 59 years, with rates of 41.2/100,000  
 117 to 28.0/100,000, respectively. For males, the highest rates were observed in Quito (Ecuador)  
 118 and Cali (Colombia), over 60 years, 11.7/100,000 to 7.3/100,000, respectively. (Table 1,  
 119 Figure 1).

120

121 **Table 1.** Age standardized incidence rate (ASIR), number of cases (*N*), average annual  
 122 percent change (AAPC), and incidence rate ratio (SIR) for thyroid cancer, according to age  
 123 and sex, in Cali (Colombia), Costa Rica, Goiania (Brazil), Quito (Ecuador) and Valdivia  
 124 (Chile), for the period 1990–2012.

| Population Based<br>Cancer Registries | Data          | Age   | Male              |                                | Female               |                                | SRI  |
|---------------------------------------|---------------|-------|-------------------|--------------------------------|----------------------|--------------------------------|------|
|                                       |               |       | ASIR ( <i>N</i> ) | AAPC<br>(IC 95% <sup>1</sup> ) | ASIR<br>( <i>N</i> ) | AAPC<br>(IC 95% <sup>1</sup> ) |      |
| Cali (Colombia)                       | 1990-<br>2012 | 25-39 | 1.7 (88)          | <b>4.5 (1.6; 7.5)</b>          | 9.5<br>(541)         | <b>4.2 (2.8; 5.7)</b>          | 0.17 |
|                                       |               | 40-59 | 4.9 (190)         | <b>7.7 (3.7; 11.9)</b>         | 22.5<br>(1051)       | <b>5.1 (4.0; 6.3)</b>          | 0.21 |
|                                       |               | 60-74 | 7.3 (91)          | 1.3 (-2.3; 4.9)                | 27.7<br>(447)        | <b>4.5 (2.8; 6.3)</b>          | 0.26 |
|                                       |               | Total | 4.1 (369)         | <b>4.7 (2.8; 6.7)</b>          | 18.2                 | <b>4.7 (3.8; 5.6)</b>          | 0.22 |

|                  |           |       |           |                         |             |                         |      |  |
|------------------|-----------|-------|-----------|-------------------------|-------------|-------------------------|------|--|
|                  |           |       |           |                         |             | (2039)                  |      |  |
| Costa Rica       | 1990-2012 | 25-39 | 1.9 (193) | <b>7.3 (4.5; 10.3)</b>  | 13.2 (1320) | <b>6.4 (5.1; 7.6)</b>   | 0.14 |  |
|                  |           | 40-59 | 4.5 (358) | <b>5.3 (3.6; 7.0)</b>   | 28.0 (2225) | <b>7.8 (6.1; 9.6)</b>   | 0.16 |  |
|                  |           | 60-74 | 4.9 (117) | <b>7.5 (5.5; 9.7)</b>   | 20.9 (533)  | <b>6.4 (4.8; 8.1)</b>   | 0.23 |  |
|                  |           | Total | 3.5 (668) | <b>6.5 (5.3; 7.6)</b>   | 20.8 (4078) | <b>7.3 (6.4; 8.3)</b>   | 0.16 |  |
| Goiania (Brazil) | 1993-2012 | 25-39 | 3.1 (87)  | 4.1 (-0.6; 9.1)         | 11.5 (369)  | <b>8.9 (5.7; 12.3)</b>  | 0.26 |  |
|                  |           | 40-59 | 4.0 (82)  | <b>5.0 (1.2; 8.9)</b>   | 22.7 (547)  | <b>8.7 (6.1; 11.4)</b>  | 0.17 |  |
|                  |           | 60-74 | 6.3 (36)  | -1.9 (-4.9; 1.2)        | 25.6 (188)  | 3.3 (-0.2; 7.1)         | 0.24 |  |
|                  |           | Total | 4.0 (205) | <b>4.5 (2.3; 6.8)</b>   | 18.7 (1104) | <b>7.9 (5.1; 10.8)</b>  | 0.21 |  |
| Quito (Ecuador)  | 1990-2012 | 25-39 | 2.9 (107) | <b>7.0 (4.0; 10.0)</b>  | 18.0 (746)  | <b>6.2 (3.6; 8.9)</b>   | 0.16 |  |
|                  |           | 40-59 | 6.7 (173) | <b>11.7 (7.8; 15.9)</b> | 41.2 (1225) | <b>9.9 (6.6; 13.3)</b>  | 0.16 |  |
|                  |           | 60-74 | 11.7 (97) | 0.6 (-3.4; 4.7)         | 39.6 (396)  | <b>7.6 (5.9; 9.4)</b>   | 0.29 |  |
|                  |           | Total | 6.1 (377) | <b>7.3 (4.2; 10.4)</b>  | 31.6 (2367) | <b>8.3 (6.2; 10.4)</b>  | 0.19 |  |
| Valdivia (Chile) | 1998-2012 | 25-39 | 1.2 (7)   | 1.0 (-0.2; 2.2)         | 9.4 (58)    | <b>12.1 (4.6; 20.1)</b> | 0.12 |  |
|                  |           | 40-59 | 2.1 (14)  | <b>7.1 (2.7; 11.7)</b>  | 11.8 (76)   | 8.6 (-0.3; 18.4)        | 0.17 |  |
|                  |           | 60-74 | 6.1 (15)  | -3.9 (-9.1; 1.7)        | 12.9 (35)   | 1.8 (-14.0; 20.5)       | 0.47 |  |
|                  |           | Total | 2.5 (36)  | 1.2 (-7.4; 10.6)        | 11.0 (169)  | <b>7.0 (3.1; 11.0)</b>  | 0.22 |  |

125

126

127

128

129

130

131

Increasing incidence trends for thyroid cancer were evident in both sexes and all age groups, with the exception of the males, of Group 60 to 74 years in Cali (Colombia) 1.3% [95% CI:-2.3; 4.9]; Goiania (Brazil), between 25-39 years [4.1%; CI 95%: -0.6; 9.1] and between 60-74 years old [-1.9%; CI 95%: -4.9; 1.2]; Quito (Ecuador), between 60-74 years [0.6%; CI 95%:-3.4; 4.7]; Valdivia (Chile), between 25-39 years [1.0%; CI 95%:-0.2; 2.2) and

132 between 60-74 years [-3.9%; CI 95%:-9.1; 1.7]. For females, there was stability in the age  
 133 group between 60-74 years in Goiania (Brazil), [3.3%; CI 95%:-0.2; -7.1) and Valdivia  
 134 (Chile), between 40-59 years [8.6%; CI 95%:-0.3; 18.4] and between 60-74 years [1.8%; CI  
 135 95%:-14.0; 20.5]. The incidence trends by age group followed similar patterns in Cali  
 136 (Colombia), Costa Rica, Goiania (Brazil), Quito (Ecuador) and Valdivia (Chile), with the  
 137 highest increase trends for women (Table 1, Figures 1, 2 and 3.).

138 Between 1995 and 2013, the highest rates of thyroid cancer mortality were observed in  
 139 Ecuador, in the age group 60-74 years (2.2/100,000 in men and 4.8/100,000 women).  
 140 According to the ratio of the rates (ASMR), mortality was higher in women in most countries  
 141 but presented Ratio equal to 1 in Ecuador between 25-39 years and Uruguay in groups of 25-  
 142 39 years and 40-59 years (Table 2).

143

144 **Table 2.** Age standardized mortality rate (ASMR) per 100,000, number (*N*) of deaths and  
 145 mortality rate ratio (SMR) for thyroid cancer, by sex and age-group, for 17 Latin American  
 146 populations, in the period 1995–2013.

147

| Population | Data      | Age   | ASMR ( <i>N</i> ) |            | SRM  |
|------------|-----------|-------|-------------------|------------|------|
|            |           |       | Male              | Female     |      |
| Argentina  | 1997-2013 | 25-39 | 0.0 (25)          | 0.1 (45)   | 0.0  |
|            |           | 40-59 | 0.3 (238)         | 0.4 (317)  | 0.75 |
|            |           | 60-74 | 1.5 (437)         | 2.0 (755)  | 0.75 |
|            |           | Total | 0.4 (700)         | 0.6 (1117) | 0.66 |
| Brazil     | 1996-2013 | 25-39 | 0.0 (126)         | 0.0 (166)  | 0.0  |
|            |           | 40-59 | 0.3 (810)         | 0.4 (1278) | 0.75 |
|            |           | 60-74 | 1.2 (1211)        | 1.9 (2440) | 0.63 |
|            |           | Total | 0.3 (2147)        | 0.5 (3884) | 0.6  |
| Chile      | 1997-2013 | 25-39 | 0.0 (12)          | 0.0 (14)   | 0.0  |
|            |           | 40-59 | 0.4 (119)         | 0.5 (154)  | 0.8  |
|            |           | 60-74 | 1.7 (194)         | 3.0 (405)  | 0.56 |
|            |           | Total | 0.5 (325)         | 0.7 (573)  | 0.71 |
| Colombia   | 1997-2013 | 25-39 | 0.0 (38)          | 0.1 (66)   | 0.0  |
|            |           | 40-59 | 0.3 (235)         | 0.7 (495)  | 0.42 |
|            |           | 60-74 | 2.0 (411)         | 3.9 (952)  | 0.51 |
|            |           | Total | 0.5 (684)         | 1.0 (1513) | 0.5  |

|             |           |       |            |            |      |
|-------------|-----------|-------|------------|------------|------|
| Costa Rica  | 1997-2013 | 25-39 | 0.0 (2)    | 0.1 (5)    | 0.0  |
|             |           | 40-59 | 0.3 (21)   | 0.4 (27)   | 0.75 |
|             |           | 60-74 | 1.2 (31)   | 2.6 (70)   | 0.46 |
|             |           | Total | 0.3 (54)   | 0.6 (102)  | 0.5  |
| Ecuador     | 1997-2013 | 25-39 | 0.1 (21)   | 0.1 (23)   | 1.0  |
|             |           | 40-59 | 0.4 (78)   | 0.9 (184)  | 0.44 |
|             |           | 60-74 | 2.2 (144)  | 4.8 (355)  | 0.45 |
|             |           | Total | 0.6 (243)  | 1.3 (562)  | 0.46 |
| El Salvador | 1997-2013 | 25-39 | 0.0 (1)    | 0.0 (5)    | 0.0  |
|             |           | 40-59 | 0.2 (15)   | 0.4 (39)   | 0.50 |
|             |           | 60-74 | 1.2 (39)   | 2.0 (79)   | 0.6  |
|             |           | Total | 0.3 (55)   | 0.5 (123)  | 0.6  |
| Guatemala   | 2000-2013 | 25-39 | 0.0 (5)    | 0.1 (13)   | 0.0  |
|             |           | 40-59 | 0.3 (29)   | 0.6 (79)   | 0.50 |
|             |           | 60-74 | 0.9 (40)   | 2.0 (97)   | 0.45 |
|             |           | Total | 0.3 (74)   | 0.6 (189)  | 0.5  |
| México      | 1998-2013 | 25-39 | 0.0 (99)   | 0.1 (141)  | 0.0  |
|             |           | 40-59 | 0.4 (587)  | 0.8 (1181) | 0.5  |
|             |           | 60-74 | 2.1 (1015) | 4.0 (2180) | 0.52 |
|             |           | Total | 0.6 (1701) | 1.1 (3502) | 0.54 |
| Nicaragua   | 1997-2013 | 25-39 | 0.0 (2)    | 0.1 (6)    | 0.0  |
|             |           | 40-59 | 0.4 (21)   | 0.5 (36)   | 0.80 |
|             |           | 60-74 | 1.3 (25)   | 3.1 (71)   | 0.41 |
|             |           | Total | 0.4 (48)   | 0.8 (113)  | 0.5  |
| Panamá      | 1998-2013 | 25-39 | 0.1 (5)    | 0.0 (3)    | 0.0  |
|             |           | 40-59 | 0.3 (16)   | 0.5 (25)   | 0.60 |
|             |           | 60-74 | 1.9 (32)   | 2.6 (48)   | 0.73 |
|             |           | Total | 0.5 (53)   | 0.7 (76)   | 0.71 |
| Paraguay    | 1996-2013 | 25-39 | 0.0 (5)    | 0.0 (3)    | 0.0  |
|             |           | 40-59 | 0.5 (43)   | 0.6 (49)   | 0.83 |
|             |           | 60-74 | 2.1 (57)   | 3.2 (91)   | 0.65 |
|             |           | Total | 0.6 (105)  | 0.8 (143)  | 0.75 |
| Peru        | 1999-2013 | 25-39 | 0.0 (23)   | 0.1 (36)   | 0.0  |
|             |           | 40-59 | 0.4 (126)  | 0.7 (271)  | 0.57 |
|             |           | 60-74 | 1.7 (214)  | 3.7 (509)  | 0.45 |

|           |           |       |           |           |      |
|-----------|-----------|-------|-----------|-----------|------|
|           |           | Total | 0.5 (363) | 1.0 (816) | 0.5  |
| Suriname  | 1995-2013 | 25-39 | -         | -         | -    |
|           |           | 40-59 | -         | 0.2 (2)   | -    |
|           |           | 60-74 | 0.7 (2)   | 2.3 (8)   | 0.3  |
|           |           | Total | 0.1 (2)   | 0.5 (10)  | 0.2  |
| Uruguay   | 1997-2010 | 25-39 | 0.1 (3)   | 0.1 (3)   | 1.0  |
|           |           | 40-59 | 0.5 (24)  | 0.5 (25)  | 1.0  |
|           |           | 60-74 | 1.5 (38)  | 2.3 (75)  | 0.65 |
|           |           | Total | 0.5 (65)  | 0.6 (103) | 0.83 |
| Venezuela | 1996-2013 | 25-39 | 0.0 (20)  | 0.1 (32)  | 0.0  |
|           |           | 40-59 | 0.4 (154) | 0.6 (245) | 0.66 |
|           |           | 60-74 | 1.6 (207) | 2.8 (405) | 0.57 |
|           |           | Total | 0.5 (381) | 0.8 (682) | 0.62 |

148

149

150 There was no homogeneous pattern in trends of mortality in the 16 countries studied  
 151 (Figure 4). In the age group 60-74 years, for women, it was observed an increase in  
 152 Guatemala and reduction in Brazil. For men, the eleven countries that had historical series  
 153 showed a trend of stability (Argentina, Brazil, Chile, Colombia, Ecuador, El Salvador,  
 154 Guatemala, Mexico, Peru, Uruguay, and Venezuela). There was reduction in male mortality  
 155 rate in Brazil, aged 40-59 years (-1.23%; CI 95%: -2.42; -0.02), while in female, the highest  
 156 increase was observed in Guatemala (8.77%; CI 95%: 3.06-14.81), for all ages (Table 3).

157

158 **Table 3.** Thyroid cancer mortality trends, by sex and age-group for 17 Latin American  
 159 populations, in the period 1995–2013.

| Population | Data      | Age   | AAPC (95% CI)        |                      |
|------------|-----------|-------|----------------------|----------------------|
|            |           |       | Male                 | Female               |
| Argentina  | 1997-2013 | 25-39 | -                    | -                    |
|            |           | 40-59 | -1.11 (-4.18; 2.07)  | 0.52 (-1.81; 2.90)   |
|            |           | 60-74 | 0.70 (-2.03; 3.51)   | -1.06 (-2.73; 0.64)  |
|            |           | Total | 0.26 (-1.70; 2.26)   | -0.62 (-1.88; 0.66)  |
| Brazil     | 1996-2013 | 25-39 | 0.29 (-3.79; 4.55)   | 0.86 (-3.51; 5.44)   |
|            |           | 40-59 | -1.23 (-2.42; -0.02) | -0.76 (-1.69; 0.18)  |
|            |           | 60-74 | -0.37 (-1.63; 0.90)  | -1.46 (-2.33; -0.59) |



|             |           |       |                     |                      |
|-------------|-----------|-------|---------------------|----------------------|
|             |           | Total | -0.62 (-1.48; 0.24) | -1.15 (-1.81; -0.49) |
| Chile       | 1997-2013 | 25-39 | -                   | -                    |
|             |           | 40-59 | -3.14 (-7.18; 1.09) | -1.42 (-4.98; 2.27)  |
|             |           | 60-74 | -1.00 (-3.99; 2.09) | -0.91 (-2.50; 0.71)  |
|             |           | Total | -1.95 (-4.01; 0.16) | -0.97 (-2.43; 0.50)  |
| Colombia    | 1997-2013 | 25-39 | -                   | -                    |
|             |           | 40-59 | -0.26 (-3.00; 2.56) | 0.52 (-1.60; 2.67)   |
|             |           | 60-74 | -0.94 (-3.02; 1.19) | 0.11 (-1.38; 1.61)   |
|             |           | Total | -0.84 (-2.27; 0.62) | 0.35 (-0.92; 1.63)   |
| Costa Rica  | 1997-2013 | 25-39 | -                   | -                    |
|             |           | 40-59 | -                   | -                    |
|             |           | 60-74 | -                   | -2.94 (-7.48; 1.82)  |
|             |           | Total | -                   | -1.72 (-6.04; 2.80)  |
| Ecuador     | 1997-2013 | 25-39 | -                   | -                    |
|             |           | 40-59 | -0.13 (-4.84; 4.81) | 2.11 (-2.23; 6.65)   |
|             |           | 60-74 | 0.75 (-2.92; 4.57)  | 2.01 (-0.88; 4.98)   |
|             |           | Total | 0.49 (-2.38; 3.45)  | 1.83 (-0.33; 4.03)   |
| El Salvador | 1997-2013 | 25-39 | -                   | -                    |
|             |           | 40-59 | -                   | -                    |
|             |           | 60-74 | 1.47 (-3.79; 7.03)  | -0.76 (-4.86; 3.51)  |
|             |           | Total | -1.20 (-5.59; 3.39) | 1.89 (-2.44; 6.41)   |
| Guatemala   | 2000-2013 | 25-39 | -                   | -                    |
|             |           | 40-59 | -                   | -                    |
|             |           | 60-74 | 6.75 (-1.07; 15.18) | 8.37 (2.02; 15.13)   |
|             |           | Total | 5.74 (-0.69; 12.58) | 8.77 (3.06; 14.81)   |
| Mexico      | 1998-2013 | 25-39 | 3.60 (-2.68; 10.29) | 2.73 (-0.91; 6.51)   |
|             |           | 40-59 | 0.75 (-1.58; 3.14)  | 0.63 (-0.48; 1.74)   |
|             |           | 60-74 | 0.68 (-0.86; 2.24)  | 0.68 (-0.05; 1.41)   |
|             |           | Total | 0.71 (-0.30; 1.74)  | 0.73 (0.20; 1.27)    |
| Nicaragua   | 1997-2013 | 25-39 | -                   | -                    |
|             |           | 40-59 | -                   | -                    |
|             |           | 60-74 | -                   | -                    |
|             |           | Total | -                   | 4.07 (0.07; 8.24)    |
| Panama      | 1998-2013 | 25-39 | -                   | -                    |
|             |           | 40-59 | -                   | -                    |

|           |           |       |                     |                     |
|-----------|-----------|-------|---------------------|---------------------|
|           |           | 60-74 | -                   | -                   |
|           |           | Total | -                   | -0.20 (-4.40; 4.18) |
| Paraguay  | 1996-2013 | 25-39 | -                   | -                   |
|           |           | 40-59 | -                   | -                   |
|           |           | 60-74 | -                   | -                   |
|           |           | Total | -                   | 1.82 (-1.95; 5.73)  |
| Peru      | 1999-2013 | 25-39 | -                   | -                   |
|           |           | 40-59 | 3.87 (-3.58; 11.89) | -2.17 (-4.52; 0.23) |
|           |           | 60-74 | 0.49 (-3.45; 4.60)  | 0.56 (-1.03; 2.18)  |
|           |           | Total | 1.51 (-1.83; 4.97)  | -0.33 (-1.39; 0.74) |
| Uruguay   | 1997-2010 | 25-39 | -                   | -                   |
|           |           | 40-59 | -                   | -                   |
|           |           | 60-74 | -1.36 (-5.12; 2.55) | -0.22 (-6.42; 6.38) |
|           |           | Total | -0.82 (-7.24; 6.04) | -1.86 (-7.70; 4.35) |
| Venezuela | 1996-2013 | 25-39 | -                   | -                   |
|           |           | 40-59 | -1.06 (-3.55; 1.49) | 0.06 (-1.51; 1.66)  |
|           |           | 60-74 | 0.52 (-1.79; 2.88)  | 1.12 (-0.47; 2.74)  |
|           |           | Total | -0.07 (-1.77; 1.66) | 0.66 (-0.35; 1.69)  |

160

161

## 162 DISCUSSION

163 The incidence of thyroid cancer occurred more frequently in the age group of 40 to 59  
 164 years in Costa Rica and Quito (Ecuador), while in Cali (Colombia), Goiania (Brazil) and  
 165 Valdivia (Chile) there was a higher incidence in the age group over 60 years. The highest  
 166 rates were observed in women, found similar to other studies (8,17).

167 Increased incidence trends were detected for the women and the stability trends were  
 168 observed in Cali, Goiania, Quito and Valdivia for men in the age group above 60 years. The  
 169 increase in incidence trends, for both sexes, is also observed in developed and developing  
 170 countries, such as Denmark (male: AAPC = 3.2%;  $p < 0.05$  and female: AAPC = 3.6%;  $p <$   
 171  $0.05$ ); United States (male: AAPC = 3.1%; CI 95%: 2.7-3.5 and female: AAPC = 3.7%; CI  
 172 95%: 3.3-4.1) and China with AAPC =22.86% (CI 95%: 19.2-26.7), similar to both sexes (18-  
 173 20).

174 The main risk factor associated with thyroid cancer is ionizing radiation because this  
 175 gland is radiosensitive in young age and is in a position that allows for greater uptake of  
 176 radiation. This increased incidence may be related to increased individual radiation dose

177 observed in recent decades, through medical and dental diagnostic procedures, which has  
178 greater impact when exposure occurs during childhood (21, 22).

179 The factors that contribute to the temporal trends and geographic variations include the  
180 prevalence of obesity and diabetes among the countries (23, 24). It can be verified that in  
181 Latin America and the Caribbean, 16% of men and 20% of women were obese (25). Another  
182 factor is the enrichment of iodine in the diet, whose risk for thyroid cancer may differ based  
183 on the availability of iodine, is excess or scarcity (3, 26). By analyzing the incidence of  
184 thyroid cancer in São Paulo (Brazil) and the United States it was found that the differences in  
185 the nutritional status of iodine among populations may have affected the observed incidence  
186 patterns (27).

187 Other possible risk factors associated with women are sex hormones in interaction  
188 with the Thyroid-Stimulating Hormone (TSH), which can play a critical role in the  
189 development of thyroid malignancy, as well as advanced age in menopause and the greater  
190 parity (28, 29). In men, it was found a positive association with the story of goiter, thyroid  
191 nodules and family history of cancer (30). However, the consumption of tobacco and alcohol  
192 were not associated with increased risk (31, 32).

193 However, authors discuss whether there is a real increase of thyroid cancer or dealing  
194 with an epidemic of diagnoses, due to the heterogeneous pattern between a rising incidence  
195 and mortality rates (10, 33). This increased incidence is assigned to detection of subclinical  
196 disease and non-lethal, for better access to the health system, incidental detection of the image  
197 and more frequent biopsy (34, 35). Sierra et al. (5) showed that the increased incidence of  
198 thyroid cancer in Argentina, Brazil, Chile and Costa Rica was driven primarily by the  
199 increased incidence of papillary subtype.

200 The distinctive thyroid cancer, follicular and papillary subtypes, which represents the  
201 highest percentage of all thyroid cancers and is responsible for the increasing incidence of the  
202 disease, presents very good prognosis and low mortality (36). The estimated survival rate of 5  
203 years for thyroid cancer is excellent when identified. The age has a strong effect on the  
204 disease-specific survival because it decreases with the increasing of age. Furthermore, males  
205 were associated with a significantly worse survival rate among patients with regional disease  
206 (37).

207 In most of the countries of Latin America there was stability in the mortality trend.  
208 Corroborating with the finds in China, there was stability in mortality from thyroid cancer  
209 (AAPC = 2.05%; CI 95%:-1.7-6.0), for both sexes, and Central Serbia, male AAPC= 2.4%  
210 (CI 95%: -0.5-5.5) and female AAPC=-1.3% (CI 95%: -4.4-1.9) (19, 38). In the United States,

211 in the 1994-2013 period, the mortality increased 0.9% per year (CI 95%: 0.7 -1.5), for both  
212 sexes (20).

213 Only Argentina, Brazil, Chile, Cuba and Nicaragua in Latin America are  
214 implementing policies, strategies or action plans specifically for cancer. Countries such as  
215 Belize, Ecuador, Mexico, Nicaragua and Panama are advancing in this regard, while several  
216 countries in the region have an absence (or lack) of relevant information that would make  
217 possible their monitoring strategies for cancer control (39).

218 In regard to the quality of the data, the absence of population-based registers with  
219 historical series made it impossible for the inclusion of other data. To mortality, differences  
220 were found in the comprehensiveness and completeness of the 17 countries studied, ranging  
221 from 55% in the Dominican Republic completeness and 90% in Argentina, Chile, Costa Rica,  
222 Mexico, Uruguay and Venezuela. In addition, the percentage of ill-defined deaths ranged from  
223 5% (Costa Rica and Mexico) to 24% (El Salvador) (40). Despite these limitations, the data  
224 have been validated by international organizations and can be used to describe the mortality in  
225 Latin American countries (41-43).

226 This study analyzed the incidence of thyroid cancer in four cities and one country of  
227 Latin America (Costa Rica) and the mortality trends for thyroid cancer in 16 countries of  
228 Latin America. Both incidences as mortality showed differences, with an increase in women  
229 of Cali (Colombia), Costa Rica, Goiania (Brazil) and Quito (Ecuador). There was stability in  
230 mortality trends in most countries of Latin America.

231

232

233 **Figure 1. Thyroid cancer age-adjusted incidence rates (95% confidence interval) for sex,**  
234 **age range 25-39 and 40-59 years, for Cali (Colombia), Costa Rica, Goiania (Brazil),**  
235 **Quito (Ecuador) and Valdivia (Chile), for the period 1990–2012. 95% CI: 95%**  
236 **confidence interval. The grayline represents trends over the period.**

237

238 **Figure 2. Thyroid cancer age-adjusted incidence rates (95% confidence interval), by sex,**  
239 **age 60-74 years and total, for Cali (Colombia), Costa Rica, Goiania (Brazil), Quito**  
240 **(Ecuador) and Valdivia (Chile), for the period 1990–2012. 95% CI: 95% confidence**  
241 **interval. The grayline represents trends over the period.**

242

243 **Figure 3. Temporal trends in thyroid cancer mortality, according to sex, and age 60-74**  
244 **years, in 16 Latin American countries, for the period 1995–2013. (A) Female; (B) Male.**

245

246

247 **AUTHOR CONTRIBUTIONS**

248 Conceptualization: DS MC IR.

249 Data curation: FF IR.

250 Formal analysis: FF IR.

251 Funding acquisition: FF IR.

252 Investigation: FF DS MC IR.

253 Methodology: DS MC IR.

254 Project administration: IR.

255 Resources: FF DS MC IR.

256 Software: DS MC IR.

257 Supervision: DS IR.

258 Validation: DS MC IR.

259 Visualization: FF DS MC IR.

260 Writing ± original draft: FF.

261 Writing ± review & editing: FF DS MC IR.

262

263 **REFERENCES**

264

- 265 1. Ferlay J, Soerjomataram I, Dikshit R, Eser S, Mathers C, Rebelo M, et al. Cancer  
266 incidence and mortality worldwide: Sources, methods and major patterns in Globocan  
267 2012. *Int J Cancer*. 2015; 136: E359-E386. doi: 10.1002/ijc.29210.
- 268 2. Global Burden of Disease Cancer Collaboration. Global, Regional, and National  
269 Cancer Incidence, Mortality, Years of Life Lost, Years Lived With Disability, and  
270 Disability-Adjusted Life-Years for 29 Cancer Groups, 1990 to 2016: A Systematic  
271 Analysis for the Global Burden of Disease Study. *JAMA Oncology*. 2018. doi:  
272 10.1001/jamaoncol.2018.2706.

- 273 3. Vigneri R, Malandrino P, Vigneri P. The changing epidemiology of thyroid cancer:  
274 why is incidence increasing? *Curr Opin Oncol.* 2015;27:1–7. DOI:  
275 10.1097/CCO.0000000000000148.
- 276 4. Ferlay J, Steliarova-Foucher E, Lortet-Tieulent J, Rosso S, Coebergh JWW, Comber  
277 H, Bray F. Cancer incidence and mortality patterns in Europe: estimates for 40  
278 countries in 2012. *European journal of cancer.* 2013;49(6):1374-1403.
- 279 5. Sierra MS, Soerjomataram I, Forman D. Thyroid cancer burden in Central and South  
280 America. *Cancer Epidemiology.* 2016;44S:S150–S157. Doi:  
281 <http://dx.doi.org/10.1016/j.canep.2016.07.017>.
- 282 6. Borges AKM, Miranda-Filho A, Koifmam S, Koifman RJ. Thyroid Cancer Incidences  
283 From Selected South America Population-Based Cancer Registries: An Age-Period-  
284 Cohort Study. *J GlobOncol.* 2017. DOI: <https://doi.org/10.1200/JGO.17.00024>.
- 285 7. Vaccarella S, Maso LD, Laversanne M, Bray F, Plummer M, Franceschi S. The  
286 Impact of Diagnostic Changes on the Rise in Thyroid Cancer Incidence: A Population-  
287 Based Study in Selected High-Resource Countries. *Thyroid.* 2015;25.  
288 <https://doi.org/10.1089/thy.2015.0116>.
- 289 8. Vecchia CL et al. Thyroid cancer mortality and incidence: A global overview.*Int. J.*  
290 *Cancer.* 2014;136:2187-2195. DOI: 10.1002/ijc.29251.
- 291 9. Vergamini LB, Frazier AL, Abrantes FL, Ribeiro KB, Rodriguez-Galindo C. Increase  
292 in the Incidence of Differentiated Thyroid Carcinoma in Children, Adolescents, and  
293 Young Adults: A Population-Based Study. *J Pediatr.* 2014;164:1481-5.  
294 <http://dx.doi.org/10.1016/j.jpeds.2014.01.059>.
- 295 10. Kitahara CM, Sosa JA. The changing incidence of thyroid cancer. *Nature.* 2016; 12.  
296 doi: 10.1038/nrendo.2016.110.
- 297 11. Adam MA, Thomas S, Hyslop T, Scheri RP, Roman SA, Sosa JA. Exploring the  
298 Relationship Between Patient Age and Cancer-Specific Survival in Papillary Thyroid  
299 Cancer: Rethinking Current Staging Systems. *J ClinOncol.* 2016; 34: 4415-4420. doi:  
300 10.1200/JCO.2016.68.9372.
- 301 12. Lewis DR et al. Early Estimates of Cancer Incidence for 2015: Expanding to Include  
302 Estimates for White and Black Races. *Cancer.* 2018. DOI: 10.1002/cncr.31315.
- 303 13. Ferlay J, Bray F, Steliarova-Foucher E, Forman D. Cancer incidence in five  
304 continents, CI5plus. IARC Cancer Base; 2014.

- 305 14. World Health Organization (WHO) Databank. Health statistics and information  
306 systems. Geneva, Switzerland: WHO. Available at [http://www.who.int/healthinfo/  
307 statistics/mortalityrawdata/en/](http://www.who.int/healthinfo/statistics/mortalityrawdata/en/) (accessed May 2018).
- 308 15. Program JR. Version 4.5.0.0 ed: Statistical methodology and applications branch,  
309 Surveillance Research Program, National Cancer Institute.
- 310 16. Kim HJ, Fay MP, Feuer EJ, Midthune DN. Permutation tests for joinpoint regression  
311 with applications to cancer rates. *Stat Med.* 2000;19:335-351.
- 312 17. Meza R, Chang JT Multistage carcinogenesis and the incidence of thyroid cancer in  
313 the US by sex, race, stage and histology. *BMC Public Health.* 2015;15:789. DOI:  
314 10.1186/s12889-015-2108-4.
- 315 18. Mirian C, Grønhøj C, Jensen DH, Jakobsen KK, Karnov K, Jensen JS et al. Trends in  
316 thyroid cancer: Retrospective analysis of incidence and survival in Denmark 1980–  
317 2014. *Cancer Epidemiology.* 2018;55:81–7.  
318 <https://doi.org/10.1016/j.canep.2018.05.009>.
- 319 19. Du L, Wang Y, Sun X, Li H, Geng X, Ge M, Zhu Y. Thyroid cancer: trends in  
320 incidence, mortality and clinical-pathological patterns in Zhejiang Province, Southeast  
321 China. *BMC Cancer.* 2018;18:291. <https://doi.org/10.1186/s12885-018-4081-7>.
- 322 20. Lim H, Devesa SS, Sosa JA, Check D, Kitahara CM. Trends  
323 in Thyroid Cancer Incidence and Mortality in the United States, 1974-2013.  
324 *JAMA.* 2017; 317(13):1338-1348. DOI: 10.1001/jama.2017.2719.
- 325 21. Pellegriti G, Frasca F, Regalbuto C, Squatrito S, Vigneri R. Worldwide Increasing  
326 Incidence of Thyroid Cancer: Update on Epidemiology and Risk Factors. *J  
327 CancerEpidemiol.* 2013. <http://dx.doi.org/10.1155/2013/965212>.
- 328 22. Mitsutake N, Fukushima T, Matsuse M, Rogounovitch T, Saenko V, Uchino S et al.  
329 *BRAFV600E* mutation is highly prevalent in thyroid carcinomas in the young  
330 population in Fukushima: a different oncogenic profile from Chernobyl. *Nature.*  
331 2015;5(16976). DOI: 10.1038/srep16976.
- 332 23. Li H, Quian J. Association of diabetes mellitus with thyroid cancer risk: A meta-  
333 analysis of cohort studies. *Medicine.* 2017;96:47.  
334 <http://dx.doi.org/10.1097/MD.00000000000008230>.
- 335 24. Marcello MA, Cunha LL, Batista FA, Ward LS. Obesity and thyroid cancer.  
336 *Endocrine-Related Cancer.* 2014;21:255–271. DOI: 10.1530/ERC-14-0070.
- 337 25. Kelly T, Yang W, Chen C-S, Reynolds K, He J. Global burden of obesity in 2005 and  
338 projections to 2030. *International Journal of Obesity.* 2008;32:1431–1437.



- 339 26. Cho YA, Kim J. Dietary Factors Affecting Thyroid Cancer Risk: A Meta-Analysis.  
340 Nutr Cancer. 2015;67(5):811-7. DOI: 10.1080/01635581.2015.1040517.
- 341 27. Veiga LHS, Gila Neta, Aschebrook-Kilfoy B, Ron E, Devesa SS. Thyroid Cancer  
342 Incidence Patterns in Sao Paulo, Brazil, and the U.S. SEER Program, 1997–2008.  
343 Thyroid. 2013;23(6):748-757. DOI: 10.1089/thy.2012.0532.
- 344 28. Cao Y, Wang Z, Gu J, Hu F, Qi Y, Yin Q, Sun Q, Li G, Quan B. Reproductive Factors  
345 but Not Hormonal Factors Associated with Thyroid Cancer Risk: A Systematic  
346 Review and Meta-Analysis. BioMed Research International. 2015.  
347 <http://dx.doi.org/10.1155/2015/103515>.
- 348 29. Zhu J et al. Parity and thyroid cancer risk: a meta-analysis of epidemiological studies.  
349 Cancer Medicine. 2016;5(4):739–752. DOI: 10.1002/cam4.604.
- 350 30. Zivaljevic V, Slijepcevic N, Sipetic S, Paunovic I, Diklic A, Zoric G et al. Risk factors  
351 for well-differentiated thyroid cancer in men. Tumori. 2013;99:456-460. DOI:  
352 10.1700/1361.15094.
- 353 31. Sadeghi H, Rafei M, Bahrami M, Haghdoost A, Shabani Y. Attributable risk fraction  
354 of four lifestyle risk factors of thyroid cancer: a meta-analysis. J Public Health  
355 (Oxf). 2017;9:1-8. DOI: 10.1093/pubmed/fox088.
- 356 32. Hong S-H, Myung S-K, Kim HS. Alcohol Intake and Risk of Thyroid Cancer: A  
357 Meta-Analysis of Observational Studies. Cancer Res Treat. 2017;49(2):534-547.  
358 <https://doi.org/10.4143/crt.2016.161>.
- 359 33. Vecchia CL, Negri E. The thyroid cancer epidemic -overdiagnosis or a real increase?  
360 Nature. 2017. DOI: 10.1038/nrendo.2017.53.
- 361 34. Davies L et al. American Association of Clinical Endocrinologists and American  
362 College of Endocrinology Disease State Clinical Review: The Increasing Incidence of  
363 Thyroid Cancer. Endocr Pract. 2015;21(6):686–696. DOI: 10.4158/EP14466.DSCR.
- 364 35. Nagar S, Aschebrook-Kilfoy B, Kaplan EL, Angelos P, Grogan RH.  
365 Age of diagnosing physician impacts the incidence of thyroid cancer in a population.  
366 Cancer Causes Control. 2014;25(12):1627-34. DOI: 10.1007/s10552-014-0467-2.
- 367 36. Roman BR, Morris LG, Davies L. The thyroid cancer epidemic, 2017 perspective.  
368 Curr Opin Endocrinol Diabetes Obes 2017, 24:332–336. DOI:  
369 10.1097/MED.0000000000000359.
- 370 37. Banerjee M, Muenz DG, Worden FP, Wong SL, Haymart MR. Conditional Survival  
371 in Patients with Thyroid Cancer. Thyroid. 2014;24(12). DOI: 10.1089/thy.2014.0264



- 372 38. Stojanovic M, Stojanovic D, Ranc̆ic N, Ignjatovic A, Antic Z, Miljkovic S, Rajovic  
373 T. Trends in thyroid cancer incidence and mortality in Central Serbia, 1999-2014. *Ann*  
374 *Ist Super Sanita*. 2017;53(4):299-304. DOI: 10.4415/ANN\_17\_04\_05.
- 375 39. Forman D, Sierra MS. Cancer in Central and South America: Introduction. *Cancer*  
376 *Epidemiology*. 2016; S3–S10. <http://dx.doi.org/10.1016/j.canep.2016.04.008>.
- 377 40. World Health Organization (WHO) Databank. Health statistics and information  
378 systems. Geneva, Switzerland: WHO. Available at  
379 <http://www.who.int/healthinfo/statistics/mortalityrawdata/en/> (accessed July 2018).
- 380 41. Ferlay J, Soerjomataram I, Dikshit R, Eser S, Mathers C, Rebelo M, et al. Cancer  
381 incidence and mortality worldwide: sources, methods and major patterns in  
382 GLOBOCAN 2012. *Int. J. Cancer*. 2015;136: E359–E386.
- 383 42. Curado M P, Edwards B, Shin HR, Storm H, Ferlay J, Heanue M, et al. *Cancer*  
384 *incidence in five continents Vol. IX*. IARC Press, Lyon, France. 2007.
- 385 43. Forman D, Bray F, Brewster D, Gombe Mbalawa C, Kohler B, Piñeros M, et al.  
386 *Cancer incidence in Five continents Vol. X*. IARC, Lyon. 2013.

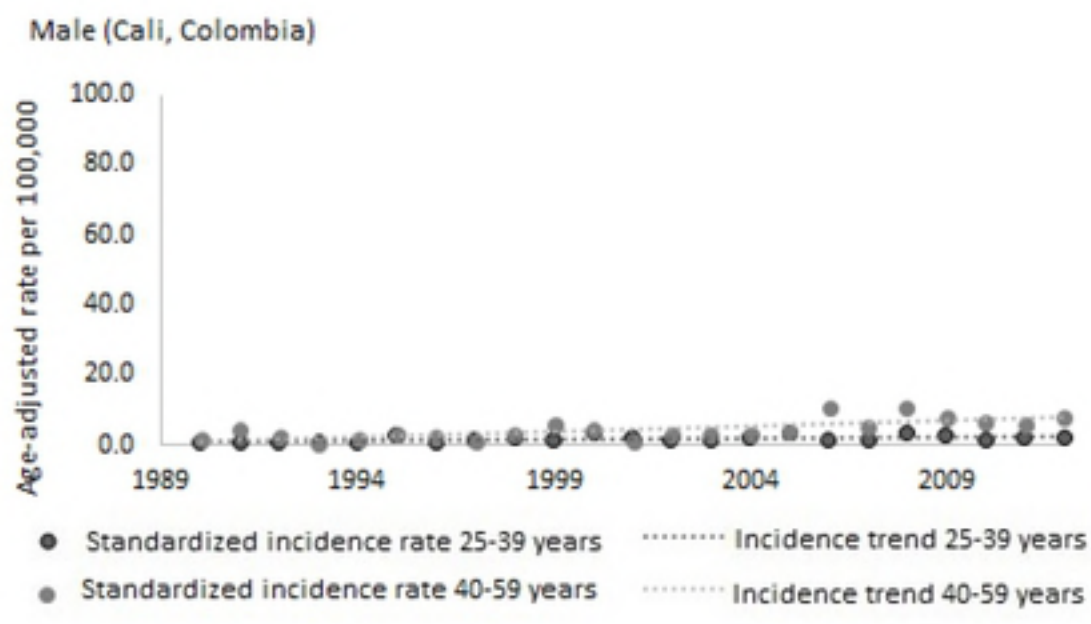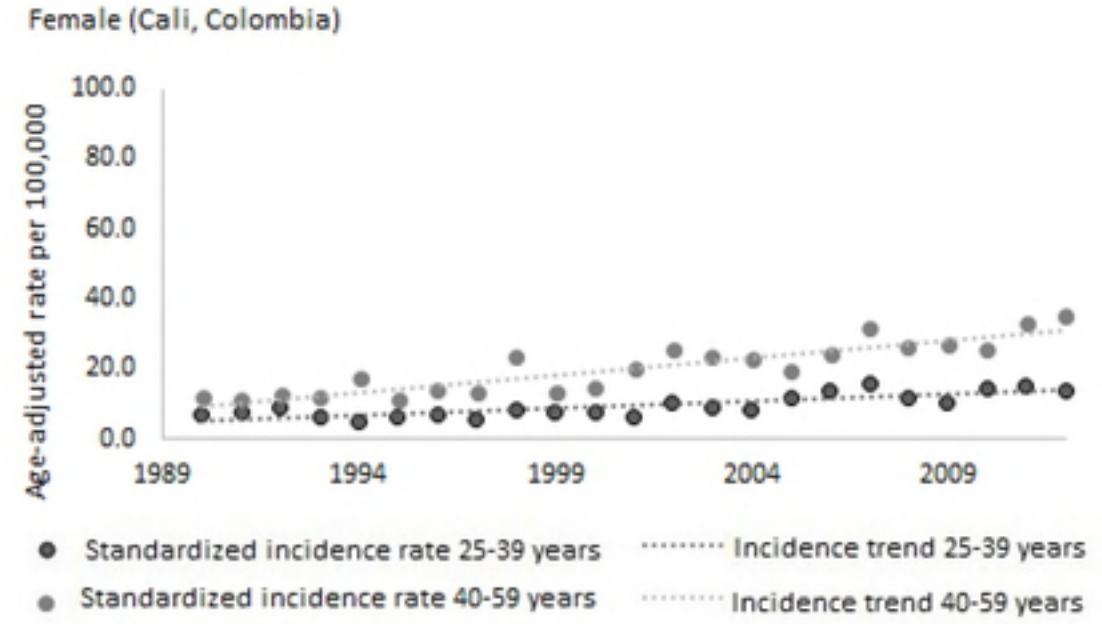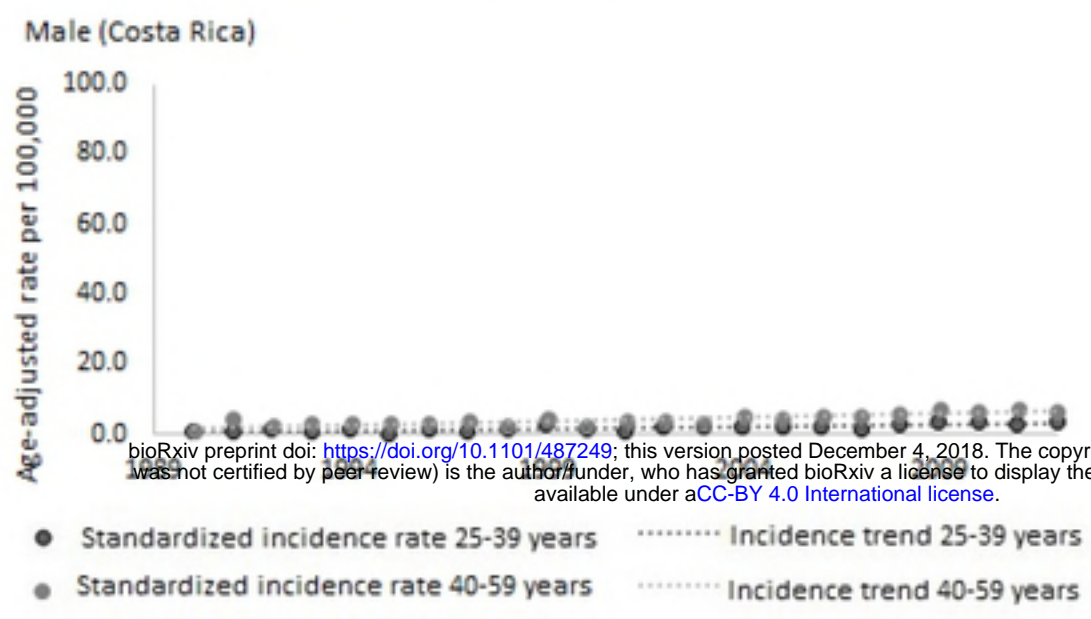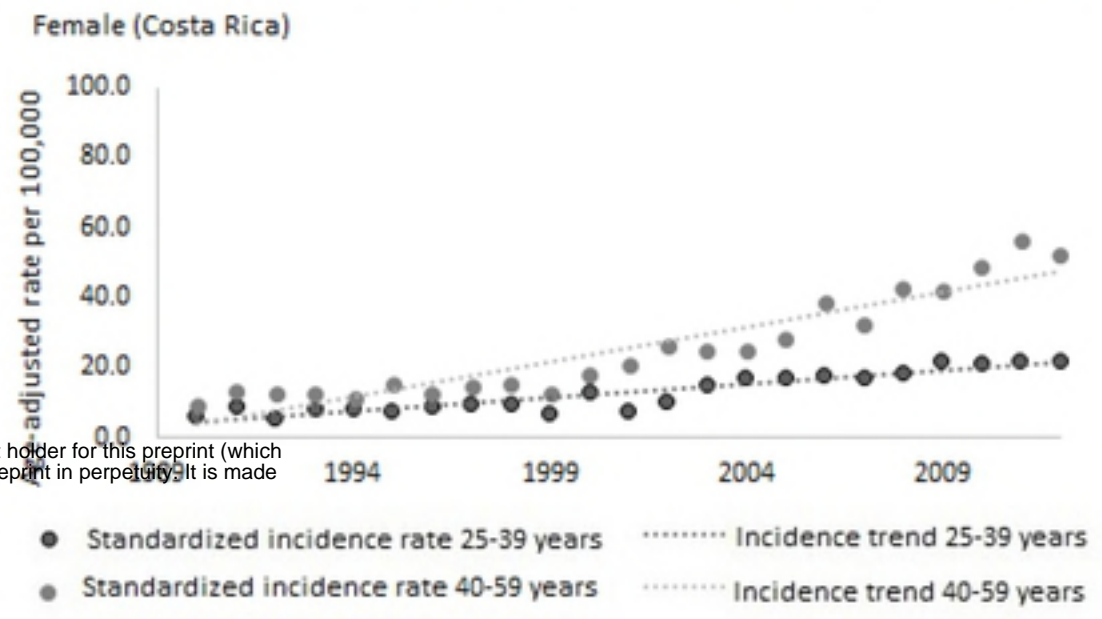

bioRxiv preprint doi: <https://doi.org/10.1101/487249>; this version posted December 4, 2018. The copyright holder for this preprint (which was not certified by peer review) is the author/funder, who has granted bioRxiv a license to display the preprint in perpetuity. It is made available under aCC-BY 4.0 International license.

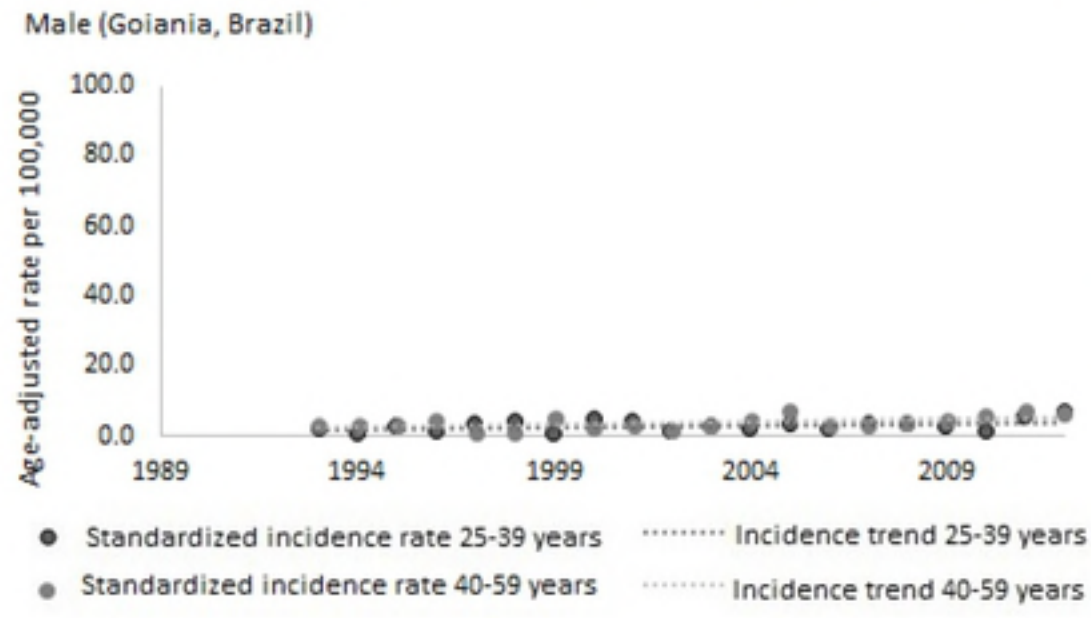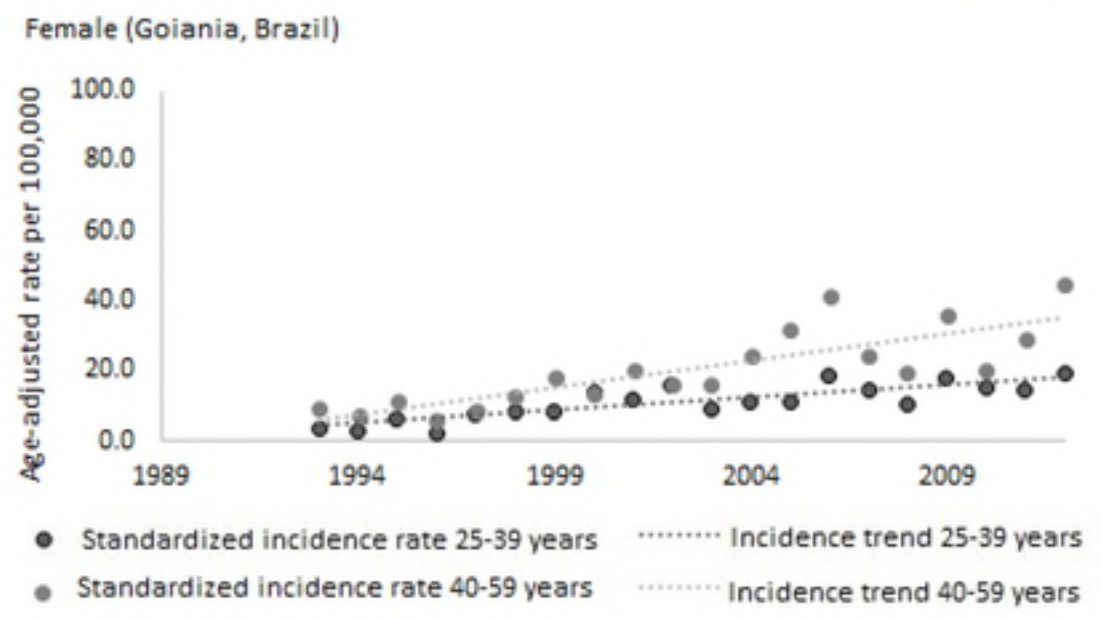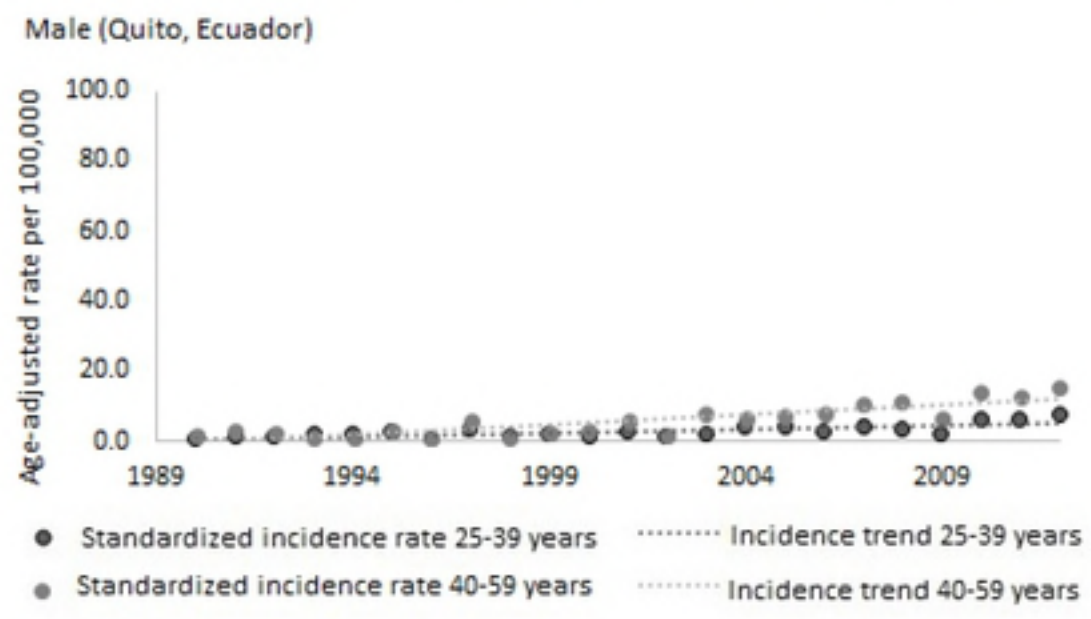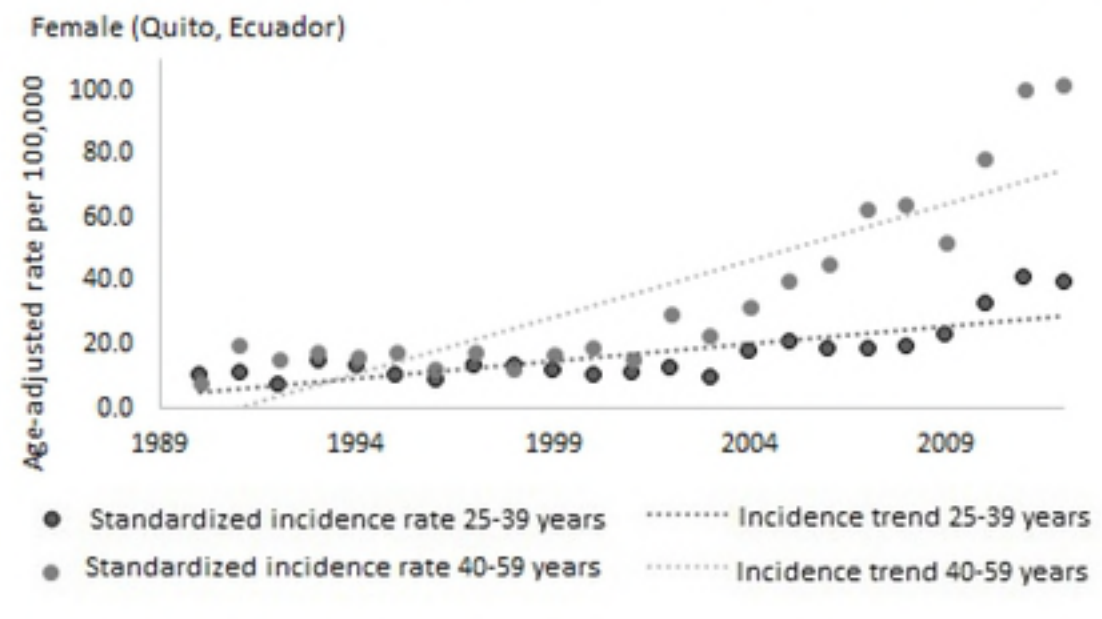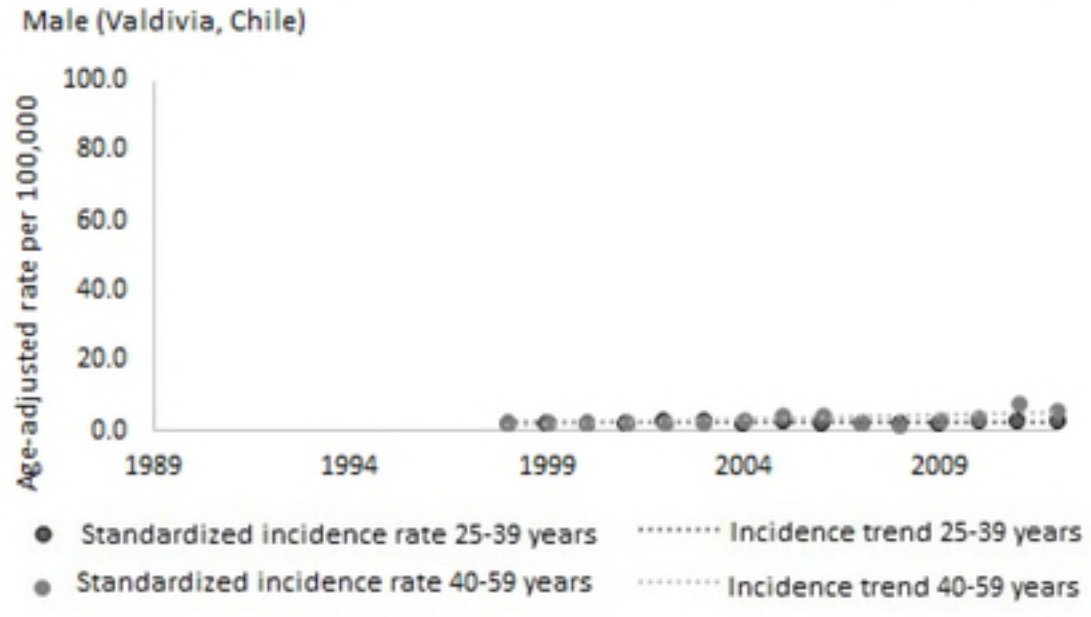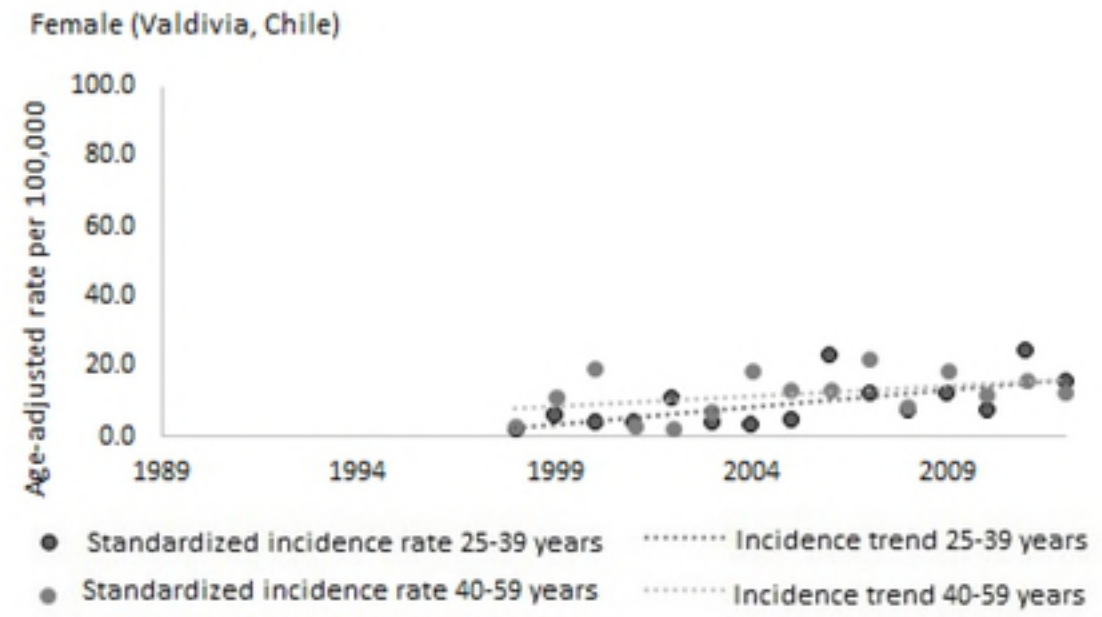

Figure 1



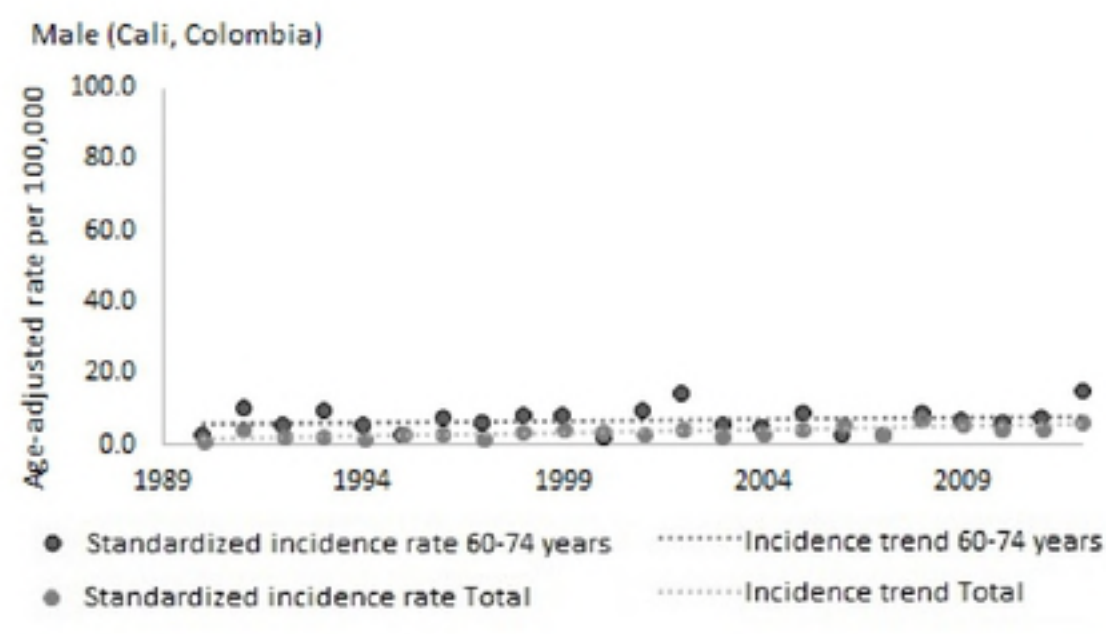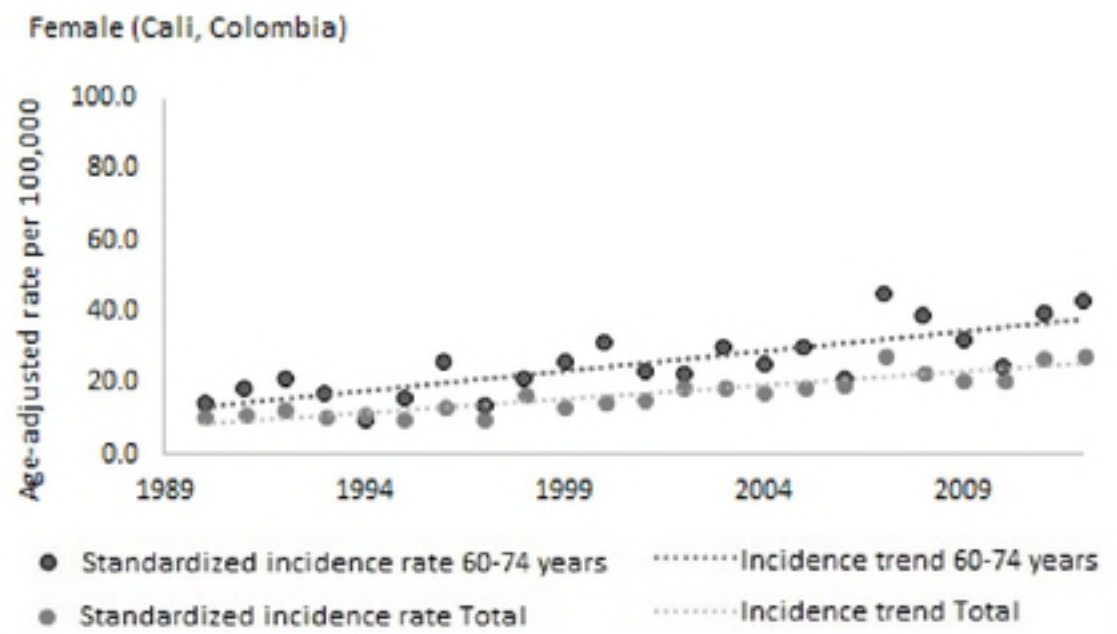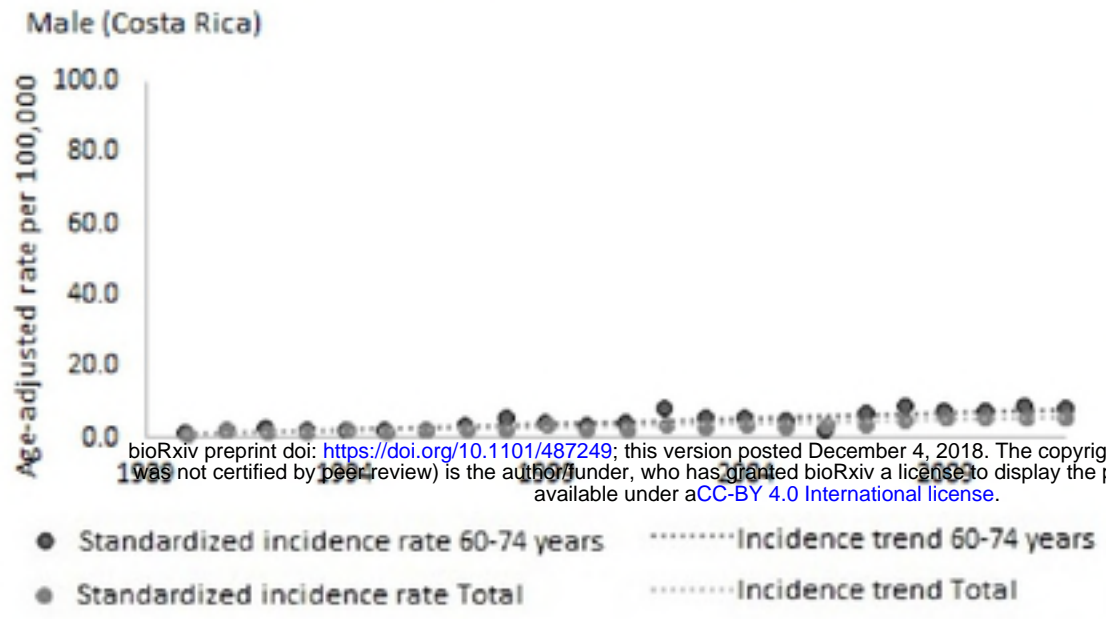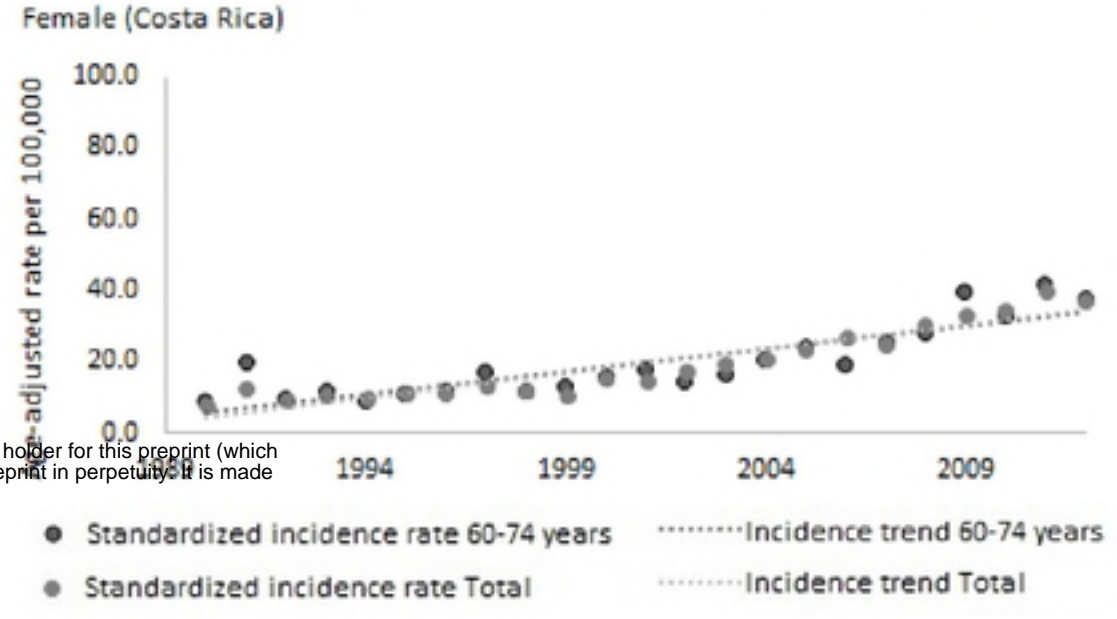

bioRxiv preprint doi: <https://doi.org/10.1101/487249>; this version posted December 4, 2018. The copyright holder for this preprint (which was not certified by peer review) is the author/funder, who has granted bioRxiv a license to display the preprint in perpetuity. It is made available under aCC-BY 4.0 International license.

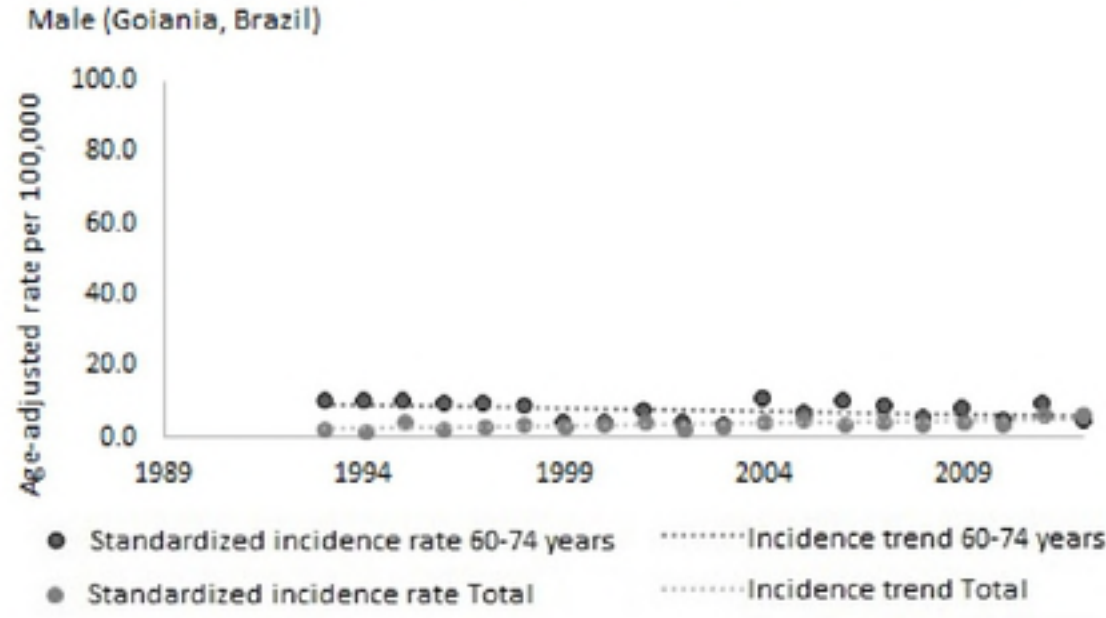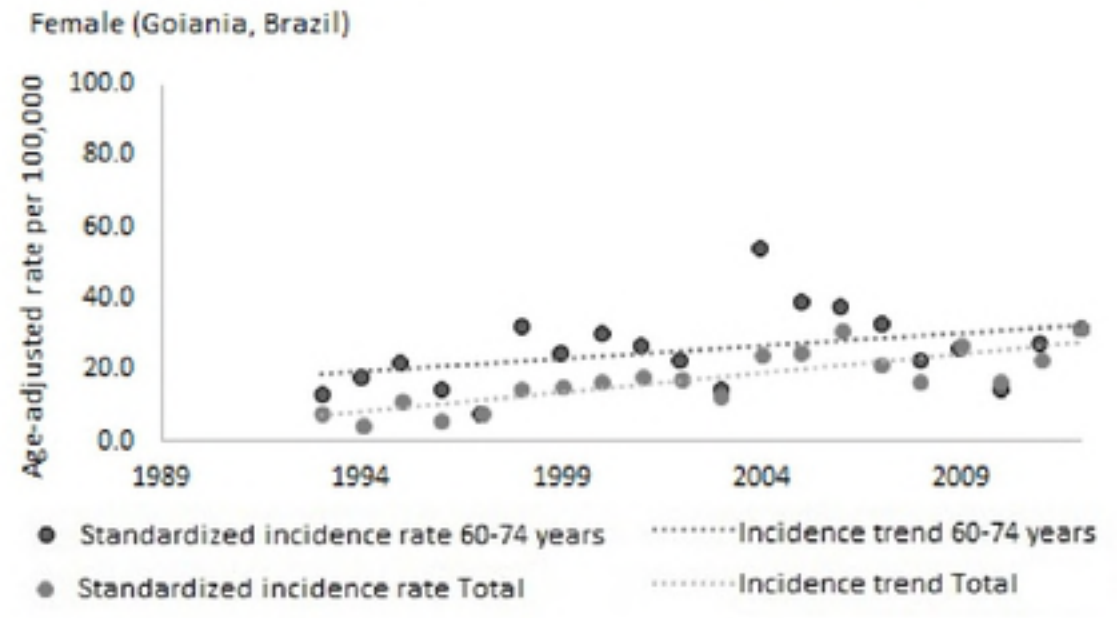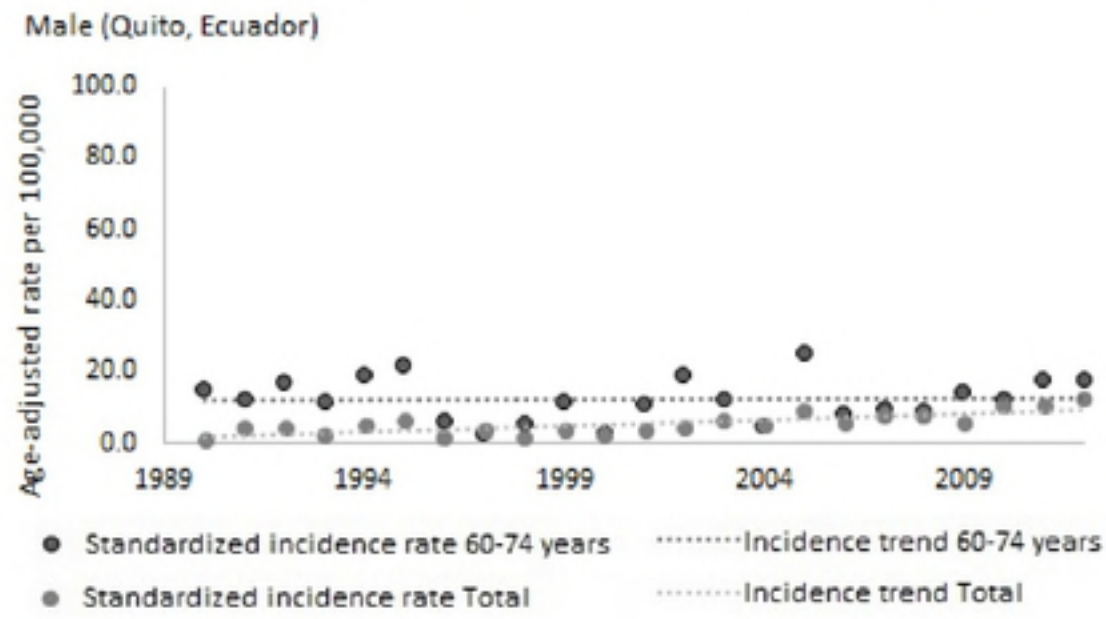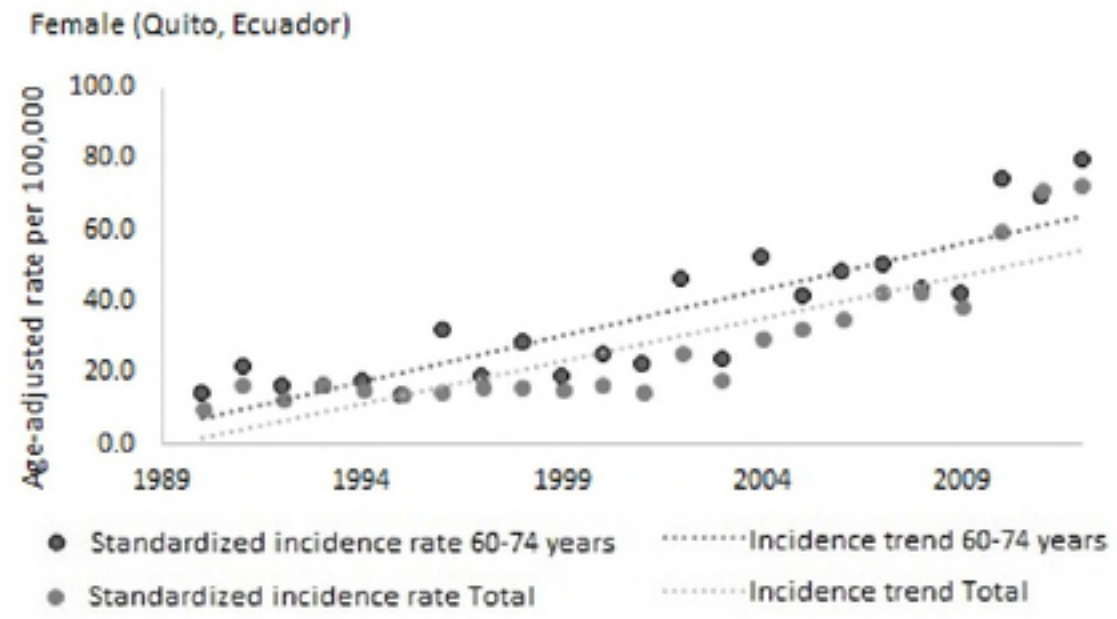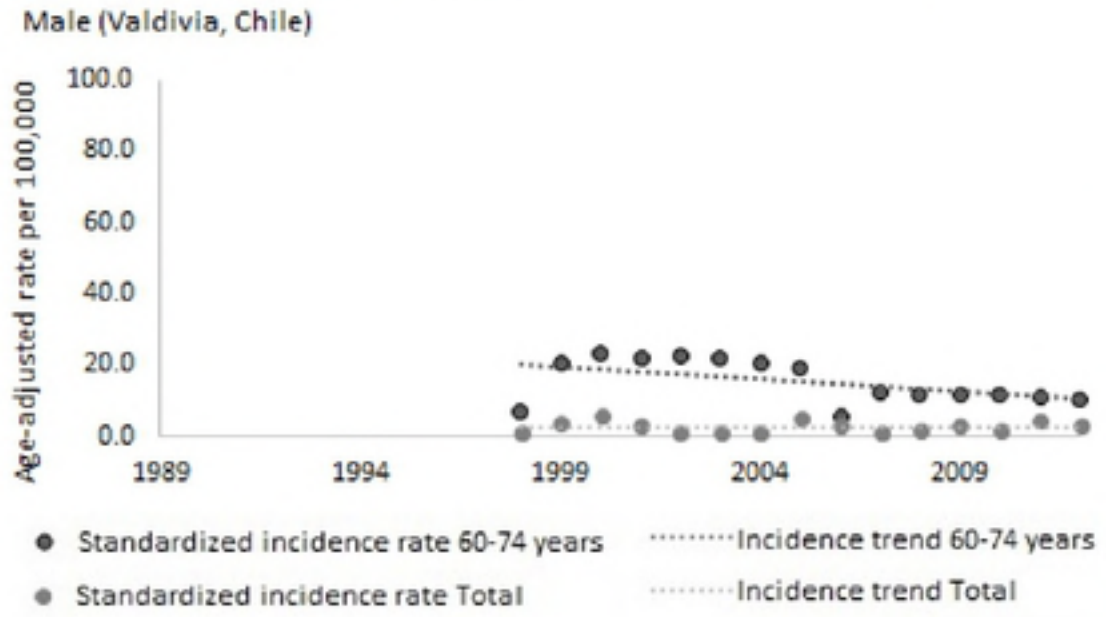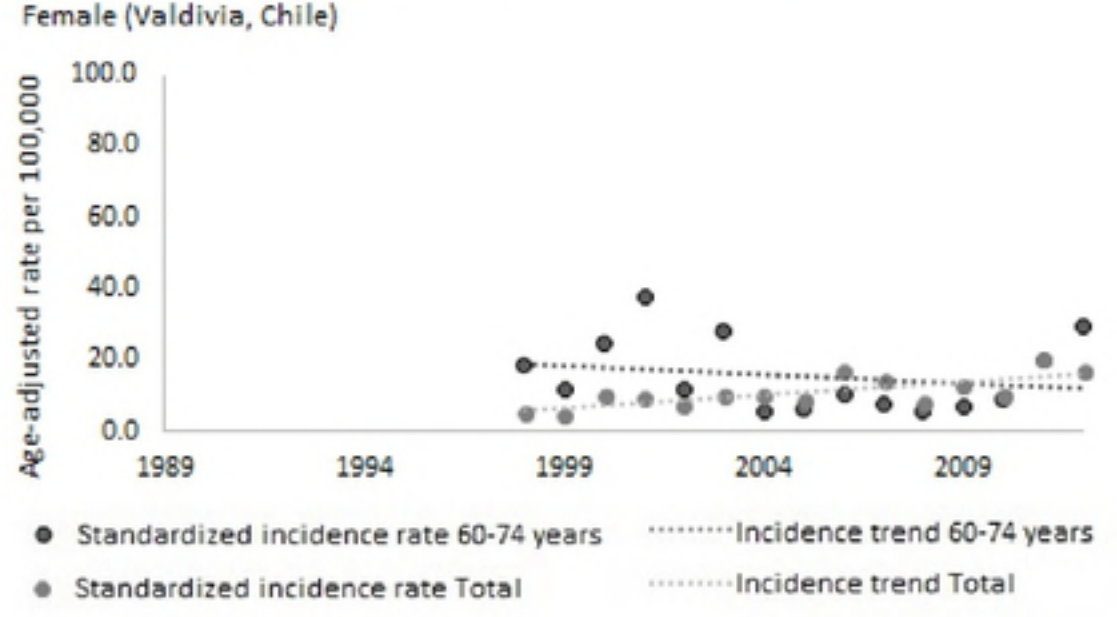

Figure 2

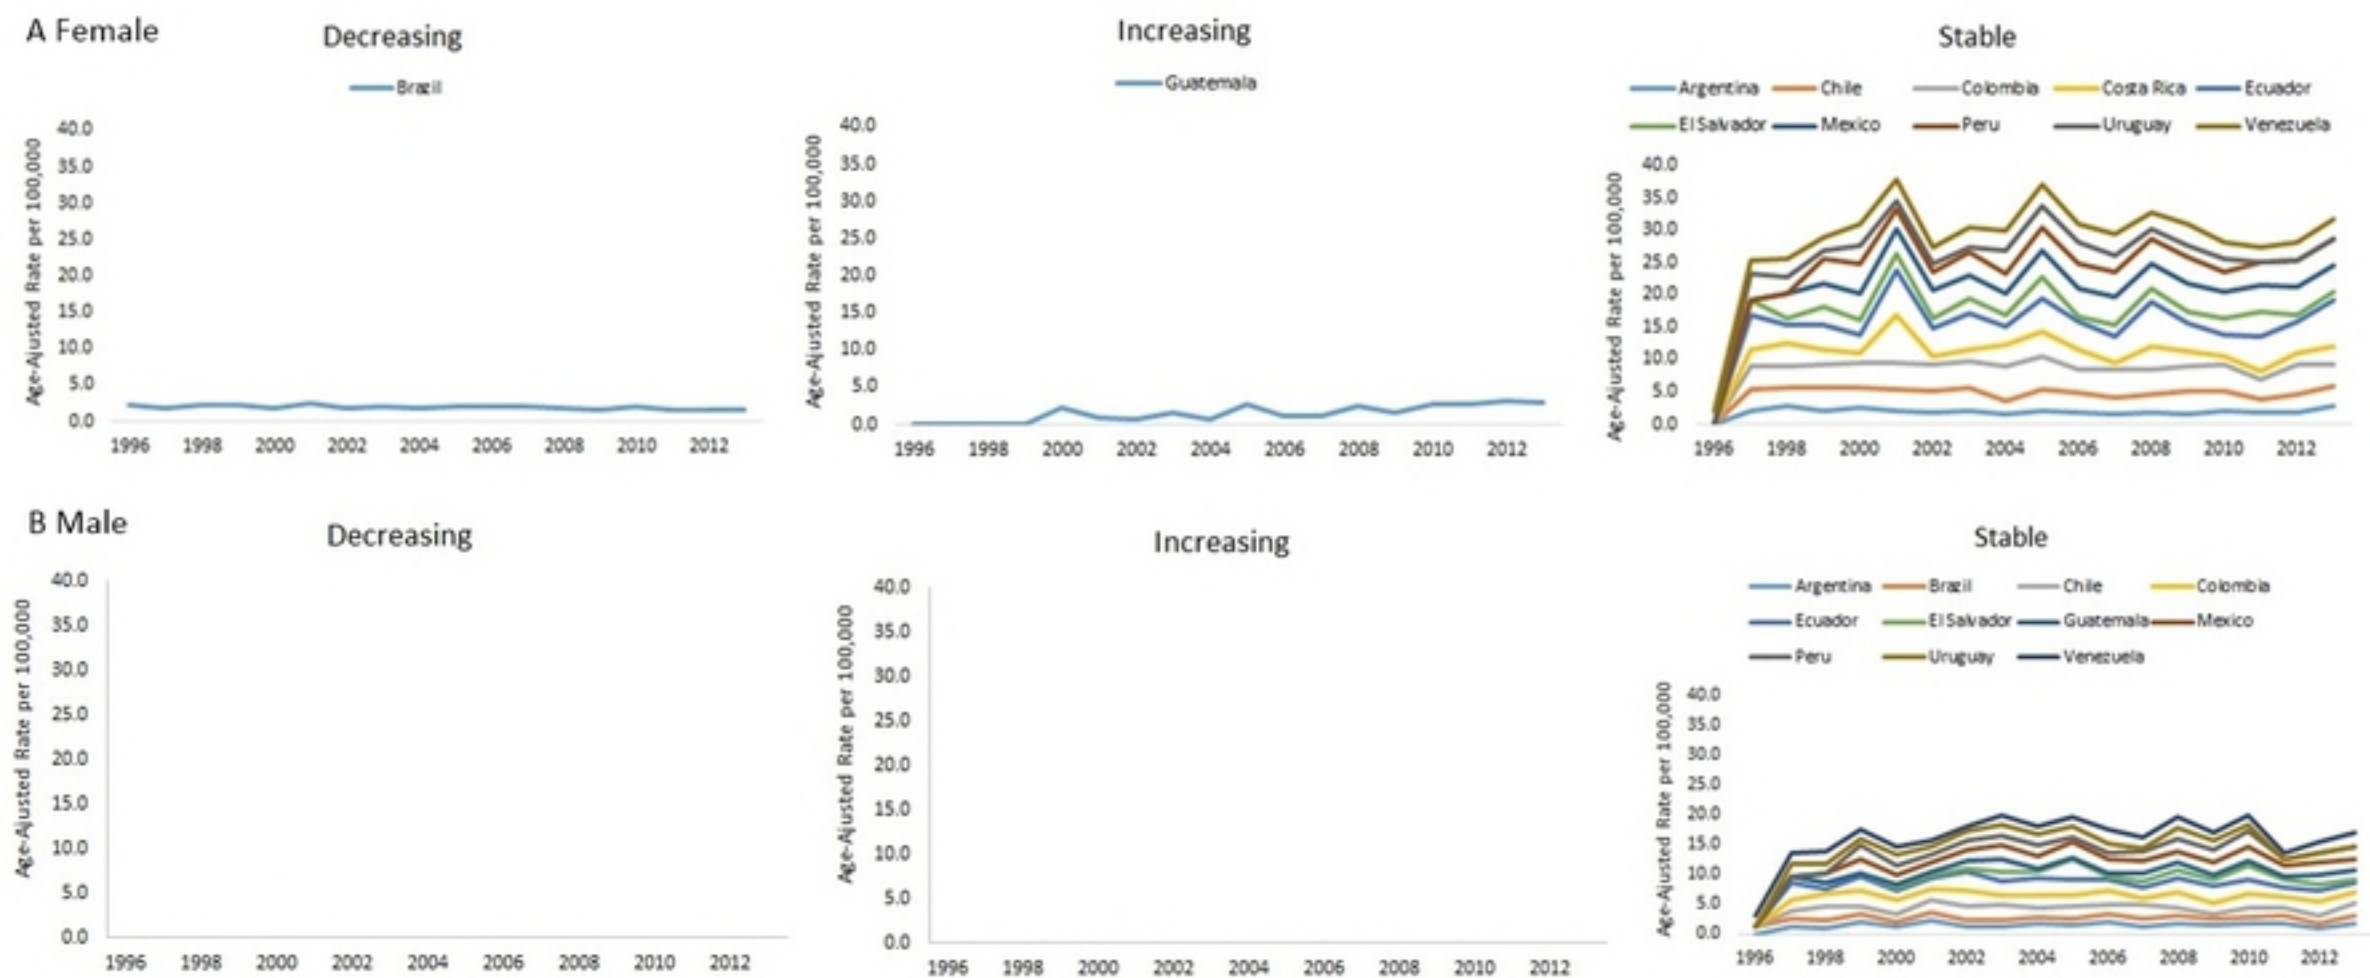

Figure 3
